# Supplementary material
Source: publisher figshare collection journal article supplement (https://sage.figshare.com/ndownloader/files/17709848)
Supplement: Supplementary file 1 [file 17709848]

## APPENDIX

### Summary of Empirical Findings on Prison Privatization

| Study                           | Setting                           | Research Design, Data Collection, and Data Analysis                                                                                                                            | Overall Findings                               |
|---------------------------------|-----------------------------------|--------------------------------------------------------------------------------------------------------------------------------------------------------------------------------|------------------------------------------------|
| <b><u>Cost</u></b>              |                                   |                                                                                                                                                                                |                                                |
| Archambeault & Deis (1997/1998) | LA; 1991-95                       | Comparing the per-inmate costs of 2 private and 1 state prisons; Agency records; Descriptive analysis                                                                          | Private cost less                              |
| Bayer & Pozen (2005)            | FL; 1997-99                       | Comparing the per-inmate costs of 17 for-profit, 64 nonprofit, 21 state, and 9 county juvenile facilities; Agency records; Inferential analysis w/ multivariate OLS regression | Private cost less; but increased recidivism    |
| Crants (1991)                   | FL, NM, TN, & TX; 1983-88         | Comparing the per-inmate costs before and after privatization in 9 correctional facilities; Agency records; Descriptive analysis                                               | Private cost less                              |
| Levinson (1985)                 | FL; n.a.                          | Comparing the per-inmate costs of 1 non-profit private and 1 public juvenile facilities; Agency records; Descriptive analysis                                                  | Inconclusive                                   |
| Logan & McGriff (1989)          | TN; 1985-88                       | Comparing the per-inmate cost of a private prison with the estimated cost if operated by county; Agency records; Descriptive analysis                                          | Private cost less                              |
| McDonald (1990)                 | CA, AZ, TX, MA, FL, & NY; 1981-89 | Comparing the per-inmate costs of 5 private and 7 public alien detention facilities; Agency records; Descriptive analysis                                                      | Private cost less                              |
| Pratt & Winston (1999)          | U.S. states; 1992-93              | Comparing the per-inmate costs of 2,126 private and 635 public juvenile facilities; Agency records; Inferential analysis w/ OLS regression                                     | Private low-security facilities only cost less |
| Sellers (1989)                  | NJ, PA, & TN; 1985-86             | Comparing the per-inmate costs of 3 private and 3 public prisons; Agency records; Descriptive analysis                                                                         | Private cost less                              |
| Thomas (1997)                   | AZ; 1995-96                       | Comparing the per-inmate costs of 1 private and 15 public facilities; Agency records; Descriptive analysis                                                                     | Private cost less                              |
| Urban Institute (1989)          | KY & MA; 1887-88                  | Comparing the per-inmate costs of 3 private and 3 public prisons; Agency records; Descriptive analysis                                                                         | Inconclusive                                   |

### **Quality**

|                                         |                                  |                                                                                                                                                                         |                                              |
|-----------------------------------------|----------------------------------|-------------------------------------------------------------------------------------------------------------------------------------------------------------------------|----------------------------------------------|
| Archambeault & Deis (1997/1998)         | LA; 1995                         | Comparing 2 private and 1 state prisons across 7 quality measures; Agency records; Descriptive analysis                                                                 | Private quality better                       |
| Armstrong & MacKenzie (2003)            | U.S. States; 1998                | Comparing 16 private and 32 public juvenile facilities across 13 quality measures; Inmate and facility surveys; Inferential analysis w/ HLM                             | Inconclusive w/ no sig. difference           |
| Austin & Coventry (2001)                | U.S. States; 1995-97             | Comparing 65 private and 1,500 public prisons across numerous quality measures; Facility survey; Descriptive analysis                                                   | Inconclusive; Differ across quality measures |
| Bacak & Ridgeway (2018)                 | U.S. States; 2005                | Comparing 360 private and 1,030 public prisons across 3 health quality measures; Facility survey; Inferential analysis w/ propensity score matching and DR estimation   | Private quality worse in 1 of 3 measures     |
| Brakel (1988)                           | TN; 1984                         | Comparing a private prison with other public prison in which 20 inmates had previously served across 16 quality measures (N=102); Inmate survey; Qualitative analysis   | Private quality better                       |
| Burkhardt & Jones (2016)                | U.S. States and Federal; 1990-05 | Comparing court orders and consent decrees among private and public prisons (N=1,196-1,489); Facility survey; Inferential analysis w/ multivariate logistic regression  | Inconclusive                                 |
| Camp & Gaes (2002)                      | U.S. Federal; 1989-99            | Comparing 91 private and public prisons across 5 quality measures; Facility survey; Descriptive analysis                                                                | Private quality worse                        |
| Camp, Gaes, Klein-Saffran et al. (2002) | U.S. Federal; 2000               | Comparing 1 private and 3 public prisons across 16 quality measures; Inmate survey; Inferential analysis w/ HLM                                                         | Inconclusive; Differ across quality measures |
| Camp et al (2002)                       | U.S. Federal; 1998-99            | Comparing 1 private and 3 public prisons across 4 management quality measures; Staff survey; Inferential analysis w/ HLM and ANOVA)                                     | Inconclusive; Differ across quality measures |
| Levinson (1985)                         | FL; n.a.                         | Comparing 1 non-profit private and 1 public juvenile facilities w/ multiple quality measures; Staff survey, agency records, and observations; Descriptive analysis      | Private quality worse                        |
| Logan (1992)                            | NM; 1989-89                      | Comparing 1 profit and 2 public female prisons across 8 quality dimensions (333 measures); Institutional records and surveys of staff and inmates; Descriptive analysis | Private quality better                       |

|                             |                               |                                                                                                                                                                                        |                                              |
|-----------------------------|-------------------------------|----------------------------------------------------------------------------------------------------------------------------------------------------------------------------------------|----------------------------------------------|
| Logan (1996)                | NM; n.a.                      | Comparing 1 private and 2 public female prisons across 21 management quality measures; Staff survey, agency records, & observations; Descriptive analysis                              | Private quality better                       |
| Lukemeyer & McCorkle (2006) | U.S. States and Federal; 1995 | Comparing 18 private and 855 public prisons across 3 order measures; Facility survey; Inferential analysis w/ multivariate probit regression                                           | Private quality better in some measures      |
| Makarios & Maahs (2012)     | U.S. States & Federal; 2000   | Comparing 105 private, 80 federal, and 944 state prisons across 15 quality measures; facility survey; Inferential analysis w/ multivariate OLS and logistic regressions                | Inconclusive; Differ across quality measures |
| Sellers (1989)              | NJ, PA, & TN; 1985-86         | Comparing the availability of treatment between 3 private and 3 public prisons; Agency records; Descriptive analysis                                                                   | Private quality better                       |
| Thomas (1997)               | AZ; 1995-96                   | Comparing 1 private and 15 public facilities across 24 quality measures; Agency records; Descriptive analysis                                                                          | Private quality better                       |
| Urban Institute (1989)      | KY & MA; 1887-88              | Comparing 3 private and 3 public prisons across 131 (MA) - 191 (KY) quality measures; Surveys of inmates and staff, interviews, agency records, & observations; Descriptive analysis   | Private quality better                       |
| Yazzie (2011)               | U.S. states; 1992-93          | Comparing the availability of treatment between 2196 private and 1037 public juvenile facilities across 10 quality measures; Facility survey; Inferential analysis w/ Chi-square tests | Inconclusive; Differ across quality measures |

### **Recidivism**

|                           |             |                                                                                                                                                                                           |                                   |
|---------------------------|-------------|-------------------------------------------------------------------------------------------------------------------------------------------------------------------------------------------|-----------------------------------|
| Bales et al. (2005)       | FL; 1995-01 | Comparing recidivism for 81,737 inmates with multiple IV/DV measures; Agency records; Inferential analysis w/ multivariate Cox regression and propensity score matching                   | Inconclusive; No sig. differences |
| Bayer & Pozen (2005)      | FL; 1997-99 | Comparing 1,115 for-profit private, 4,825 non-profit private, 1,853 public prison releases w/ multiple DV measures; Agency records; Inferential analysis w/ multivariate OLS regression   | Private Recidivism Higher         |
| Duwe & Clark (2013)       | MN; 2007-09 | Comparing 1,766 pairs of private and public prison releases w/ multiple IV/DV measures; Agency records; Inferential analysis w/ multivariate Cox regression and propensity score matching | Private Recidivism Higher         |
| Lanza-Kauce et al. (1999) | FL; 1996    | Comparing 198 pairs of private and public releases w/ multiple DV measures; Agency records; Inferential analysis w/ nonparametric statistical tests and survival analysis                 | Private Recidivism Lower          |

|                       |             |                                                                                                                                                                           |                                   |
|-----------------------|-------------|---------------------------------------------------------------------------------------------------------------------------------------------------------------------------|-----------------------------------|
| Mukherjee (2017)      | MS; 1996-13 | Comparing 5,144 private and 21,449 public releases; Agency records; Inferential analysis w/ OLS, matching, and instrumental variable regressions                          | Inconclusive; No sig. differences |
| Powers et al. (2017)  | CO; 2008-12 | Comparing 2,024 private and 4,078 public prison releases w/ multiple DV measures; Agency records; Inferential analysis w/ propensity score matching and survival analyses | Private Recidivism Higher         |
| Spivak & Sharp (2008) | OK; 1997-01 | Comparing 3,802 private and 19,312 public prison releases w/ multiple IV/DV measures; Agency records; Inferential analysis w/ multivariate survival analysis              | Private Recidivism Higher         |
| Fretz et al. (2004)   | NJ; 2004-06 | Comparing 177 private and 400 public prison releases w/ multiple DV measures; Agency records; Descriptive analysis                                                        | Private Recidivism Lower          |
| Heilbrun et al. 2008  | NJ; 2004-06 | Comparing 176 private and 241 public prison releases of female offenders w/ multiple DV measures; Agency records; Inferential analysis (t-tests)                          | Private Recidivism Lower          |

### **Non-Profit Privatization**

|                      |             |                                                                                                                                                                                         |                                             |
|----------------------|-------------|-----------------------------------------------------------------------------------------------------------------------------------------------------------------------------------------|---------------------------------------------|
| Bayer & Pozen (2005) | FL; 1997-99 | Comparing the per-inmate costs of 17 for-profit, 64 nonprofit, 21 state, and 9 county juvenile facilities; Agency records; Inferential analysis w/ multivariate OLS regression          | Private cost less; but increased recidivism |
| Bayer & Pozen (2005) | FL; 1997-99 | Comparing 1,115 for-profit private, 4,825 non-profit private, 1,853 public prison releases w/ multiple DV measures; Agency records; Inferential analysis w/ multivariate OLS regression | Private Recidivism Higher                   |
| Levinson (1985)      | FL; n.a.    | Comparing 1 non-profit private and 1 public juvenile facilities w/ multiple quality measures; Staff survey, agency records, and observations; Descriptive analysis                      | Private quality worse                       |
| Levinson (1985)      | FL; n.a.    | Comparing the per-inmate costs of 1 non-profit private and 1 public juvenile facilities; Agency records; Descriptive analysis                                                           | Inconclusive                                |

### **System-Wide Improvement**

|                         |                      |                                                                                                                                                                            |              |
|-------------------------|----------------------|----------------------------------------------------------------------------------------------------------------------------------------------------------------------------|--------------|
| Blumstein et al. (2007) | U.S. States; 1996-04 | Examining the impact of prison privatization on the cost per inmate in public prisons; Facility survey & government reports; Inferential analysis w/ panel data regression | Reduced cost |
|-------------------------|----------------------|----------------------------------------------------------------------------------------------------------------------------------------------------------------------------|--------------|

|                         |                           |                                                                                                                                                                                                                  |                                    |
|-------------------------|---------------------------|------------------------------------------------------------------------------------------------------------------------------------------------------------------------------------------------------------------|------------------------------------|
| Burkhardt (2018)        | U.S. States; 2000-05      | Examining the impact of prison privatization on quality of public confinement (safety, order, activity, and conditions); Facility survey; Inferential analysis w/ difference in difference panel data regression | Inconclusive; No sig. differences  |
| Dippel & Poyker (2018)  | U.S. States (13); 1980-17 | Examining the impact of prison privatization on sentencing; Agency records/Facility survey; Inferential analysis w/ panel data regression                                                                        | Increased sentence length          |
| Galinato & Rohla (2018) | U.S. States; 1998-08      | Examining the impact of prison privatization on incarceration rates in public prisons; Government reports; Inferential analysis w/ instrumental variables regression                                             | Increased incarceration likelihood |

### **Economic Development**

|                      |                        |                                                                                                                                            |                  |
|----------------------|------------------------|--------------------------------------------------------------------------------------------------------------------------------------------|------------------|
| Genter et al. (2013) | U.S. Counties; 1997-04 | Examining the impact of private prisons on employment growth; Government reports; Inferential analysis w/ multivariate logistic regression | Negative effects |
|----------------------|------------------------|--------------------------------------------------------------------------------------------------------------------------------------------|------------------|

### **Determinants of Privatization**

|                    |                                        |                                                                                                                                                                                                                    |                                                                                                   |
|--------------------|----------------------------------------|--------------------------------------------------------------------------------------------------------------------------------------------------------------------------------------------------------------------|---------------------------------------------------------------------------------------------------|
| Burkhardt (2016)   | U.S. States; 1990-05                   | Examining the impact of correctional, economic, & political factors on high- and low-security privatization; Facility survey; Inferential analysis w/ multivariate multinomial logistic regression                 | Political and economic factors (sig.) for high-security privatization only                        |
| Gunderson (2017)   | U.S. states; 1983-12                   | Examining the impact of political and economic determinants on privatization; Various data sources; Inferential analysis w/ multivariate Cox and OLS regressions                                                   | Union membership (sig)                                                                            |
| Gunderson (2018)   | U.S. states, federal, & local; 1986-16 | Examining the impact of inmate litigation on privatization; Agency records; Inferential analysis w/ 2 stage least squares regression                                                                               | Legal pressure (sig.)                                                                             |
| Kim & Price (2014) | U.S. states; 1999-06                   | Examining the impact of correctional and political factors on privatization in 34 states w/ private prisoners; Government reports; Inferential analysis w/ multivariate generalized estimating equation regression | Once privatization laws were adopted, subsequent decisions were driven by correctional pressures. |

|                         |                         |                                                                                                                                                                             |                                                                                                          |
|-------------------------|-------------------------|-----------------------------------------------------------------------------------------------------------------------------------------------------------------------------|----------------------------------------------------------------------------------------------------------|
| Nicholson-Crotty (2004) | U.S. states;<br>1987-98 | Examining the impact of political, economic, and legal factors at different decision-making points; Government reports; Inferential analysis w/ multivariate Cox regression | Political factors (sig.)<br>at legislative level;<br>Economic factors (sig.)<br>at administrative level. |
| Price et al. (2009)     | U.S. states;<br>2004-06 | Examining the impact of race/ethnicity and demographics on privatization; Government reports; Inferential statistics w/ OLS regression                                      | Race and living costs (sig.)                                                                             |
| Price & Riccucci (2005) | U.S. states;<br>1990    | Examining the impact of political and fiscal factors on privatization; Government reports; Inferential analysis w/ OLS regression                                           | Political factors (sig.)                                                                                 |

---
